# Supplementary material for: Time to appropriate antibiotic therapy is a predictor of outcome in patients with bloodstream infection caused by KPC-producing Klebsiella pneumoniae
Source: PubMed Central journal article supplement (PMC6993311; doi:10.1186/s13054-020-2742-9), 2020-01-30
Supplement: 13054_2020_2742_MOESM1_ESM.pdf [file 13054_2020_2742_MOESM1_ESM.pdf]

**Table S1.** *In vitro* susceptibilities of KPC-producing blood isolates collected from patients hospitalized in ICU.

| Bacterial species (isolate no.)<br>and antimicrobial agent tested | Susceptibility rates (%) |      |      |
|-------------------------------------------------------------------|--------------------------|------|------|
|                                                                   | S                        | I    | R    |
| <i>Klebsiella pneumoniae</i> (N=102)                              |                          |      |      |
| Ceftriaxone                                                       | -                        | -    | 100  |
| Ceftazidime                                                       | -                        | -    | 100  |
| Cefepime                                                          | -                        | -    | 100  |
| PIP-TAZ                                                           | -                        | -    | 100  |
| Ciprofloxacin                                                     | -                        | -    | 100  |
| Levofloxacin                                                      | -                        | -    | 100  |
| Amikacin                                                          | 12.5                     | 14.3 | 73.2 |
| Gentamycin                                                        | 42.9                     | 30.4 | 26.8 |
| Meropenem                                                         | -                        | 2    | 98   |
| Ertapenem                                                         | -                        | -    | 100  |
| TMP-SMX                                                           | 16.1                     | -    | 83.9 |
| Tigecycline                                                       | 61.5                     | 9.6  | 28.8 |
| Colistin                                                          | 70.9                     | -    | 29.1 |
| Fosfomycin                                                        | 60.7                     | -    | 39.3 |

**Table S2.** Definitive treatment regimens of patients by survival status after a KPC-Kp BSI

|                                                                                        | All patients<br>N=102 | Patients who survived<br>n=56 | Patients who did not survive<br>n=46 | p value      |
|----------------------------------------------------------------------------------------|-----------------------|-------------------------------|--------------------------------------|--------------|
| No use of <i>in vitro</i> active antibiotics                                           | 11 (10.8%)            | 2 (3.6%)                      | 9 (19.6%)                            | <b>0.010</b> |
| Only one <i>in vitro</i> active antibiotic used within 24 h                            | 18 (17.6%)            | 13 (23.3%)                    | 5 (10.9%)                            | 0.104        |
| Two or more <i>in vitro</i> active antibiotics used within 24 h                        | 37 (36.3%)            | 26 (46.4%)                    | 11 (23.9%)                           | <b>0.019</b> |
| Definitive therapy with fewer than two antibiotics displaying <i>in vitro</i> activity | 28 (27.4%)            | 18 (33.3%)                    | 10 (27%)                             | 0.522        |
| Definitive therapy with two or more antibiotics displaying <i>in vitro</i> activity    | 63 (61.8%)            | 36 (66.7%)                    | 27 (63%)                             | 0.522        |
| <b>Antibiotic regimens</b>                                                             |                       |                               |                                      |              |
| Colistin-containing regimen                                                            | 61 (59.8%)            | 34 (60.7%)                    | 27 (58.7%)                           | 0.836        |
| CAZ-AVI ± aminoglycosides/fosfomycin                                                   | 13 (12.7%)            | 10 (17.9%)                    | 3 (6.5)                              | 0.088        |
| Other regimens*                                                                        | 17 (16.7%)            | 10 (17.9%)                    | 7 (15.2%)                            | 0.722        |

BSI bloodstream infection, CAZ AVI ceftazidime-avibactam; KPC-Kp KPC-producing *Klebsiella pneumoniae*

\* Other regimens include: 8 tigecycline + meropenem, 6 tigecycline + gentamycin, 3 meropenem+ertapenem

**Table S3.** Comparison between patients who received appropriate antibiotic therapy within the first 24 hours from the blood cultures collection and those who did not.

| Characteristic                                                | Patients who received AAT<br>≤24 hours<br>N=55 | Patients who did not receive AAT<br>≤24 hours<br>N=47 | p value      |
|---------------------------------------------------------------|------------------------------------------------|-------------------------------------------------------|--------------|
| Age, years, median (IQR)                                      | 60 (53-71)                                     | 70 (53-77)                                            | 0.132        |
| Male sex                                                      | 34 (61.8%)                                     | 31 (66%)                                              | 0.665        |
| Comorbidities                                                 |                                                |                                                       |              |
| Diabetes                                                      | 9 (19.1%)                                      | 9 (16.4%)                                             | 0.713        |
| Cardiovascular disease                                        | 13 (23.6%)                                     | 23 (48.9%)                                            | 0.008        |
| Chronic renal disease                                         | 9 (16.4%)                                      | 6 (12.8%)                                             | 0.609        |
| Chronic liver disease                                         | 9 (16.4%)                                      | 4 (8.5%)                                              | 0.236        |
| COPD                                                          | 3 (5.5%)                                       | 7 (14.9%)                                             | 0.110        |
| Solid cancer                                                  | 13 (27.7%)                                     | 14 (25.5%)                                            | 0.801        |
| Hematological malignancy                                      | 9 (16.4%)                                      | 5 (10.6%)                                             | 0.402        |
| Solid organ transplantation                                   | 5 (9.1%)                                       | 3 (6.4%)                                              | 0.612        |
| Primary reason for ICU admission                              |                                                |                                                       |              |
| Trauma                                                        | 8 (14.5%)                                      | 8 (17%)                                               | 0.732        |
| Respiratory failure                                           | 7 (12.7%)                                      | 9 (19.1%)                                             | 0.374        |
| Cardiovascular disease                                        | 9 (16.4%)                                      | 7 (14.9%)                                             | 0.839        |
| Surgery                                                       | 10 (18.2%)                                     | 5 (10.6%)                                             | 0.284        |
| Infection                                                     | 8 (14.5%)                                      | 5 (10.6%)                                             | 0.555        |
| Burn injury                                                   | 5 (9.1%)                                       | 6 (12.8%)                                             | 0.551        |
| Cerebrovascular accident                                      | 3 (5.5%)                                       | 7 (14.9%)                                             | 0.110        |
| Other*                                                        | 5 (9.1%)                                       | 0                                                     | <b>0.040</b> |
| Previous hospitalization                                      | 28 (50.9%)                                     | 12 (25.5%)                                            | <b>0.009</b> |
| Previous antibiotic therapy                                   | 34 (61.8%)                                     | 24 (51.1%)                                            | 0.274        |
| Length of ICU stay after KPC-Kp BSI, days, median (IQR)       | 20 (13-30)                                     | 17 (7-25)                                             | 0.095        |
| ICU stay, days, median (IQR)                                  | 40.5 (25.75-59.25)                             | 33 (16.75-54.75)                                      | 0.074        |
| Hospital length of stay before bacteremia, days, median (IQR) | 19 (9-36)                                      | 14 (3-41)                                             | 0.215        |
| Source of infection                                           |                                                |                                                       |              |
| CVC-related bacteremia                                        | 10 (18.2%)                                     | 3 (6.4%)                                              | 0.075        |
| Primary bacteremia                                            | 6 (10.9%)                                      | 8 (17%)                                               | 0.371        |
| Respiratory tract                                             | 5 (9.1%)                                       | 6 (12.8%)                                             | 0.551        |
| Urinary tract                                                 | 13 (23.6%)                                     | 8 (17%)                                               | 0.410        |
| Skin and skin structure                                       | 12 (21.8%)                                     | 6 (12.8%)                                             | 0.232        |
| Intra-abdominal                                               | 9 (16.4%)                                      | 15 (31.9%)                                            | 0.065        |
| Endocarditis                                                  | 0                                              | 1 (2.1%)                                              | 0.277        |
| Type of acquisition                                           |                                                |                                                       |              |
| Healthcare-associated                                         | 2 (3.6%)                                       | 8 (17%)                                               | <b>0.023</b> |
| Nosocomial                                                    | 52 (94.5%)                                     | 37 (78.7%)                                            | <b>0.017</b> |
| Charlson Comorbidity Index, median (IQR)                      | 2 (1-4)                                        | 2 (1-3)                                               | 0.305        |
| KPC-Kp intestinal colonization                                | 33 (60%)                                       | 19 (40.4%)                                            | <b>0.049</b> |
| Source control                                                | 39 (70.9%)                                     | 26 (55.3%)                                            | 0.103        |
| Septic shock                                                  | 23 (41.8%)                                     | 17 (36.2%)                                            | 0.560        |
| Mechanical ventilation                                        | 26 (47.3%)                                     | 14 (29.8%)                                            | 0.071        |
| AKI                                                           | 9 (16.4%)                                      | 6 (12.8%)                                             | 0.609        |
| SOFA score, median (IQR)                                      | 6 (3-10)                                       | 5 (2-9)                                               | 0.355        |
| APACHE II score, median (IQR)                                 | 17 (12-22)                                     | 15 (11-21)                                            | 0.302        |
| DNR                                                           | 1 (1.8%)                                       | 2 (4.3%)                                              | 0.468        |

|                                                |            |            |                  |
|------------------------------------------------|------------|------------|------------------|
| Overall 30-day mortality                       | 16 (29.1%) | 30 (63.8%) | <b>&lt;0.001</b> |
| Thirty-day mortality attributable to infection | 15 (27.3%) | 28 (59.6%) | <b>0.001</b>     |
| Overall 14-day mortality                       | 11 (20%)   | 22 (46.8%) | <b>0.004</b>     |
| Overall 7-day mortality                        | 6 (10.9%)  | 15 (31.9%) | <b>0.009</b>     |

*AAT* appropriate antibiotic therapy, *AKI* acute kidney injury, *BSI* bloodstream infection, *COPD* chronic obstructive pulmonary disease, *CVC* central venous catheter, *DNR* do not resuscitate order, *ICU* intensive care unit, *IQR* interquartile range, *KPC-Kp* KPC-producing *Klebsiella pneumoniae*, *SOFA* Sequential Organ Failure Assessment

\* Other causes of ICU admission include: 1 carbon monoxide poisoning, 1 Sezary syndrome, 1 acute renal failure, 1 Wilson disease with hepatic failure, 1 thyrotoxicosis.

**Figure S1.** Thirty-day mortality among patients who received different treatment regimens stratified by site of infection.

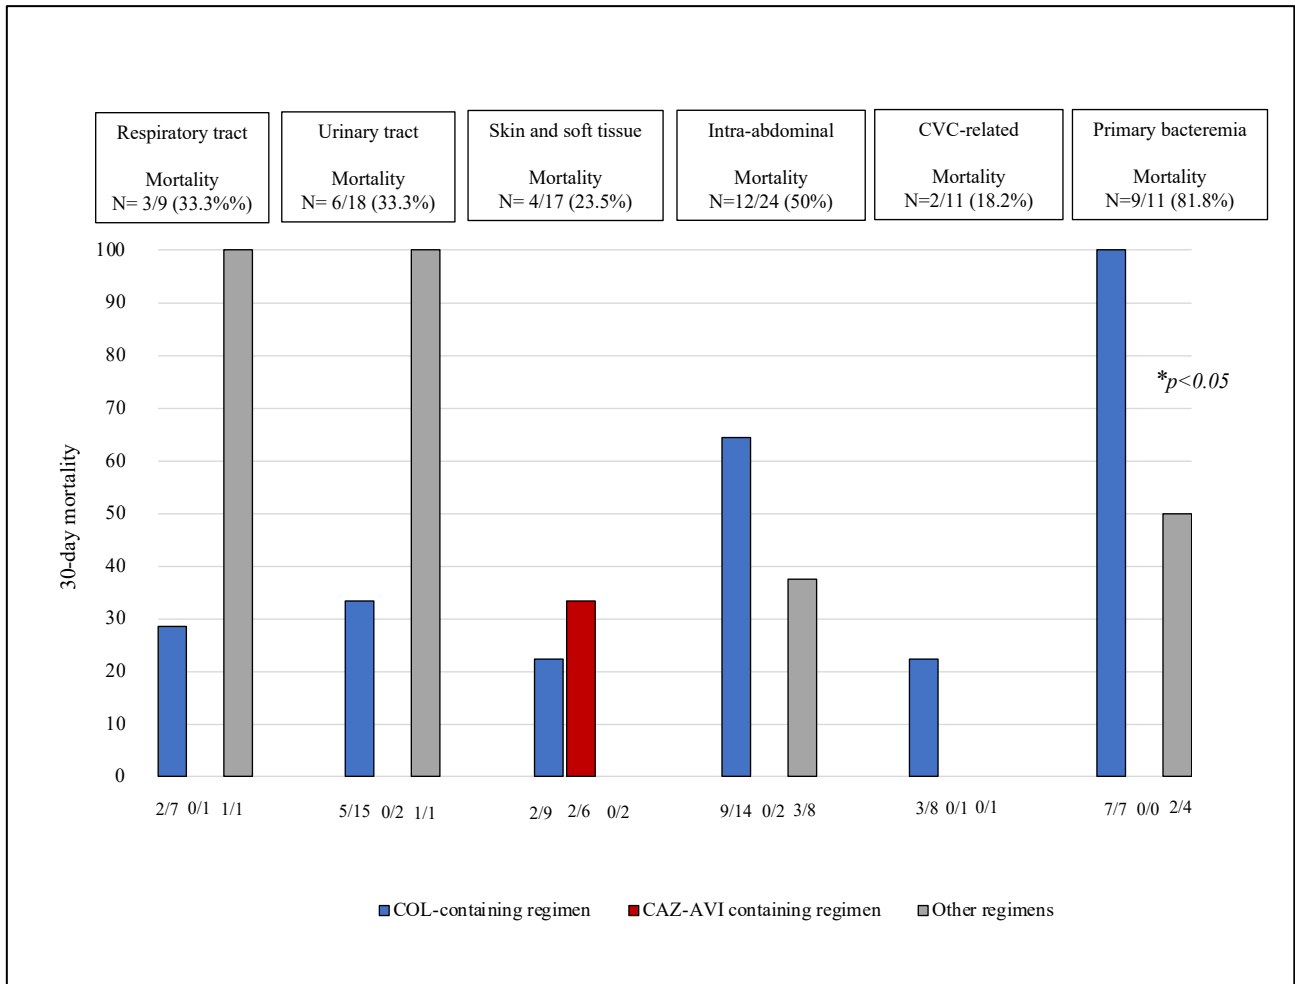

Patients who did not received in vitro active therapy (N=9) were excluded.  
 One patient with endocarditis treated with ceftazidime/avibactam died (not shown in the Figure).  
 COL= colistin; CAZ-AVI= ceftazidime-avibactam
